Anesthesiology  
1998; 88:1128  
© 1998 American Society of Anesthesiologists, Inc.  
Lippincott-Raven Publishers

## An Episode of Malignant Hyperthermia Followed by a Persisting Muscle Weakness

*To the Editor:*—We have read with great interest the report by Maeda *et al.*<sup>1</sup> describing a case of malignant hyperthermia during sevoflurane anesthesia followed by a muscle weakness persisting for almost 3 months after the event. However, a few questions regarding the diagnosis and management of what was thought to be an episode of malignant hyperthermia remain to be answered.

The signs and symptoms described are strongly suggestive of malignant hyperthermia, however, for reasons of better comparison we would have appreciated the use of the clinical grading scale for malignant hyperthermia.<sup>2</sup> According to the data given, we calculated a score exceeding 50 points. Thus, the probability of malignant hyperthermia would have to be considered as almost certain.

Second, the dose of dantrole (100 mg in a patient weighing 80 kg) seems to be rather low, which requires more detailed explanation. Unfortunately no data are given as to the postoperative concentration of creatine phosphokinase. As no muscle biopsy was performed, what was the evidence of muscle destruction in this patient? Why was no *in vitro* contracture test performed to test the susceptibility for malignant hyperthermia? Despite the high score in the clinical grading scale, the *in vitro* contracture test would have been the only means to confirm the diagnosis of malignant hyperthermia.<sup>3</sup>

**Andrea Michalek-Sauberer, M.D.**  
**Hermann Gilly, Ph.D.**

Anesthesiology  
1998; 88:1128-9  
© 1998 American Society of Anesthesiologists, Inc.  
Lippincott-Raven Publishers

*In Reply:*—I appreciate the interest in our article<sup>1</sup> expressed by Dr. Andrea Michalek-Sauberer. She raises four points regarding the diagnosis and management of malignant hyperthermia.

We agree that the use of "clinical grading scale for malignant hyperthermia"<sup>2</sup> is useful for evaluating the probability of malignant hyperthermia. However, in our case report, we did not show the grading scale because the signs and symptoms indicated malignant hyperthermia undoubtedly. According to our hospital therapeutic protocol for malignant hyperthermia, dantrolene should be used initially at a dose of 1 mg/kg, body weight, and if the signs are not improved, additional doses of dantrolene, up to 7 mg/kg, are recommended. In this case, signs were improved with initially administered dantrolene at a dose of 100 mg. The highest concentration of creatinine phosphokinase was recorded at 78,672 U/l on the next day of the operation. The high concentration of creatinine phosphokinase strongly suggested the muscle destruction. Because we could not obtain the patient's consent to the muscle biopsy, no histologic nor pharmacologic information was available.

The patient, whose occupation was a manual laborer, had been healthy before the anesthesia. The muscle weakness occurred just after the episode of malignant hyperthermia. Because the recovery

Department of Anesthesiology and General  
Intensive Care  
University of Vienna, AKH Wien  
Wahringer Guertel 18-20  
A-1090 Vienna  
Austria

### References

1. Maeda H, Iranami H, Hatano Y: Delayed recovery from muscle weakness due to malignant hyperthermia during sevoflurane anesthesia. *ANESTHESIOLOGY* 1997; 87:425-6
2. Larach MG, Lacalio AR, Allen GC, Denborough MA, Ellis FR, Gronert GA, Kaplan RF, Muldoon SM, Nelson TE, Ørding H, Rosenberg H, Waud BE, Wedel DJ: A clinical grading scale to predict malignant hyperthermia susceptibility. *ANESTHESIOLOGY* 1994; 80:771-9
3. Ørding H, Brancadoro V, Cozzolino S, Ellis FR, Glauber V, Gonnano EF, Halsall PJ, Hartung E, Heffron JJA, Heytens L, Kozak-Ribbens G, Kress H, Krivosic-Horber R, Lehmann-Horn F, Mortier W, Nivoche Y, Ranklev-Twetman E, Sigurdsson S, Snoeck M, Stieglitz P, Tegazzin V, Urwyler A, Wappler F: In vitro contracture test for diagnosis of malignant hyperthermia following the protocol of the European MH Group: Results of testing patients surviving fulminant MH and unrelated low-risk subjects. *Acta Anaesthesiol Scand* 1997; 41:955-66

(Accepted for publication December 10, 1997.)

from muscle weakness was a matter of deep concern to the patient, we performed careful tests of his muscle strength repeatedly. Although there have been numerous reports regarding diagnosis or treatment of malignant hyperthermia, to our best knowledge, no precise description concerning muscle weakness as a post-episode of malignant hyperthermia have been made. In our case, it took 3 months to recover from this weakness. Our report may provide helpful information about the post-malignant hyperthermia muscle weakness.

**Hiroshi Maeda, M.D.**  
Department of Anesthesiology  
Wakayama Medical College  
7-bancho 27, Wakayama City  
Wakayama, 640  
Japan

### References

1. Maeda H, Iranami H, Hatano Y: Delayed recovery from muscle weakness due to malignant hyperthermia during sevoflurane anesthesia. *ANESTHESIOLOGY* 1997; 87:425-6



## CORRESPONDENCE

2. Larach MG, Localio AR, Allen GC, Denborough MA, Ellis FR, Gronert GA, Kaplan RF, Muldoon SM, Nelson TE, Ørding H, Rosenberg H, Waud BE, Wedel DJ: A clinical grading scale to predict

malignant hyperthermia susceptibility. *ANESTHESIOLOGY* 1994; 80:771-9

(Accepted for publication December 10, 1997.)

Anesthesiology

1998; 88:1129

© 1998 American Society of Anesthesiologists, Inc.

Lippincott-Raven Publishers

## Pulse Oximetry May Not Reliably Assess Peripheral Perfusion

*To the Editor:*—Findlay *et al.* propose that pulse oximetry can be used to confirm adequate foot perfusion during radical perineal prostatectomy.<sup>1</sup> Specifically, they recommend that a pulse oximeter probe be attached to a toe when the legs are positioned in a fashion that potentially compromises extremity perfusion. Their theory is that "when the foot is perfused, the pulse oximeter displays a normal tracing." Conversely, "when the blood pressure decreases below a threshold value for that patient, no pulse waveform is displayed."

That pulse oximetry might be a useful measure of perfusion is intuitive and has been proposed numerous times.<sup>2-6</sup> The difficulty with this approach, however, is that pulse oximeters are "too good." Specifically, they contain extremely powerful amplifiers that can detect saturation and display a waveform even when flow is critically compromised. A further difficulty is that oximeters actually evaluate arterial pulsation, not flow *per se*. The result is a substantial potential for false-normal results.

The consensus among vascular and hand surgeons is that prolonged digital systolic arterial blood pressures <40 mmHg are likely to result in tissue injury.<sup>7-11</sup> My concern about using pulse oximetry as an index of flow is that the technique appears unreliable. In one study, for example, the technique failed to detect critical reductions in distal extremity pressure in two of three cases.<sup>12</sup> Another study demonstrated that the pulse oximeter signal is maintained (without even a "low perfusion" warning) until flow is reduced to ≈8% of normal.<sup>13</sup> Pulse oximetry obviously detects the most extreme reductions in tissue flow—those bordering on complete ischemia. However, the method proposed by Findlay *et al.*<sup>1</sup> seems likely to provide false reassurance in a substantial number of cases where flow is actually seriously restricted.

I would thus like to propose an equally easy, but potentially more reliable, measure of foot perfusion: ankle blood pressure. Simply position the cuff of an oscillometric blood pressure monitor around the ankle and confirm that the systolic arterial pressure exceeds 40 mmHg. An alternative is to attach a cuff sized for premature infants to the long toe. Obviously, pressure at these sites should be monitored at relatively infrequent intervals, say ≈10-min intervals, so the measurements themselves do not excessively restrict flow.

Human extremities are, fortunately, relatively resistant to ischemia. It would nonetheless be risky to maintain critically low foot perfusion for the duration of a radical prostatectomy or similar procedure. Measurements of ankle blood pressure will alert anesthesiologists

to inadequate perfusion, allowing interventions that might include increasing systemic blood pressure or altering patient position.

**Daniel I. Sessler, M.D.**

Department of Anesthesia

University of California, San Francisco

374 Parnassus Avenue, 3rd Floor

San Francisco, California 94143-0648

sessler@vaxine.ucsf.edu

## References

- Findlay JY, Rettke SR, Myers RP: Perfusion monitoring during radical perineal prostatectomy (letter). *ANESTHESIOLOGY* 1997; 87:457
- Nowak GS, Moorthy SS, McNiece WL: Use of pulse oximetry for assessment of collateral arterial flow. *Anesthesia* 1986; 64:527-8
- Matuski A: A modified Allen's test using a pulse oximeter. *Anaesth Intensive Care* 1988; 16:126
- Rozenberg B, Rozenberg M, Birkhan J: Allen's test performed by pulse oximeter. *Anesthesia* 1988; 43:515-6
- Griffiths DM, Ilsley AH, Runciman WB: Pulse meters and pulse oximeters. *Anaesth Intensive Care* 1988; 16:49
- Raju R: The pulse oximeter and the collateral circulation. *Anaesthesia* 1986; 41:783-4
- Yao ST, Needham TN, Gourmoos C, Irvine WT: A comparative study of strain-gauge plethysmography and Doppler ultrasound in the assessment of occlusive arterial disease of the lower extremities. *Surgery* 1972; 71:4-9
- Hirai M: Arterial insufficiency of the hand evaluated by digital blood pressure and arteriographic findings. *Circulation* 1978; 58:902-8
- Downs AR, Gaskell P, Morrow I, Munson CL: Assessment of arterial obstruction in vessels supplying the fingers by measurement of local blood pressures and the skin temperature response test—Correlation with angiographic evidence. *Surgery* 1975; 77:530-9
- Bell G, Nielsen PE, Wolfson J, Ulrich J, Engell HC, Lassen NA: Measurements of systolic pressure in the limbs of patients with arterial occlusive disease. *Surg Gynecol Obstet* 1973; 136:177-81
- Carter SA, Lezak JD: Digital systolic pressures in the lower limb in arterial disease. *Circulation* 1971; 43:905-14
- Levinsohn DG, Gordon L, Sessler DI: The Allen's test: Analysis of four methods. *J Hand Surg [Am]* 1991; 16A:279-82
- Lawson D, Norley I, Korbin G: Blood flow limits and pulse oximeter signal detection. *ANESTHESIOLOGY* 1987; 67:599-603

(Accepted for publication December 9, 1997.)

Major corporate funding for the Outcomes Research Laboratory is provided by Augustine Medical, Inc. and Apotheus Laboratories, Ltd. The authors do not consult for, accept honoraria from, or own stock or stock options in any anesthesia-related company.
